# Supplementary material for: Addressing Well-being, Burnout, and Professional Fulfillment in Child and Adolescent Psychiatry Trainees during the COVID-19 Pandemic through Implementation of a Virtual Balint-like Group: A Pilot Study
Source: Research Square preprint supplement (doi:10.21203/rs.3.rs-115144/v1), 2020-11-24
Supplement: Supplementary file 1 [file 6a5bae628ae49e66233915ac.docx]

Statement from the ICMJE

Website: http://www.icmje.org/about-icmje/faqs/clinical-trials-registration/

Date of Access: Nov 24, 2020

Our study does not require registration with ICMJE base on the following guidelines:

“Some trials assign health care providers, rather than patients, to intervention and comparison/control groups. If the purpose of the trial is to examine the effect of the provider intervention on the health outcomes of the providers' patients, then investigators should register the trial. If the purpose is to examine the effect only on the providers (for example, provider knowledge or attitudes), then registration is not necessary.”
